# Supplementary material for: Genes Identification, Molecular Docking and Dynamics Simulation Analysis of Laccases from Amylostereum areolatum Provides Molecular Basis of Laccase Bound to Lignin
Source: MDPI journal article supplement (doi:10.3390/ijms21228845), 2020-11-22
Supplement: s1 [file s1]

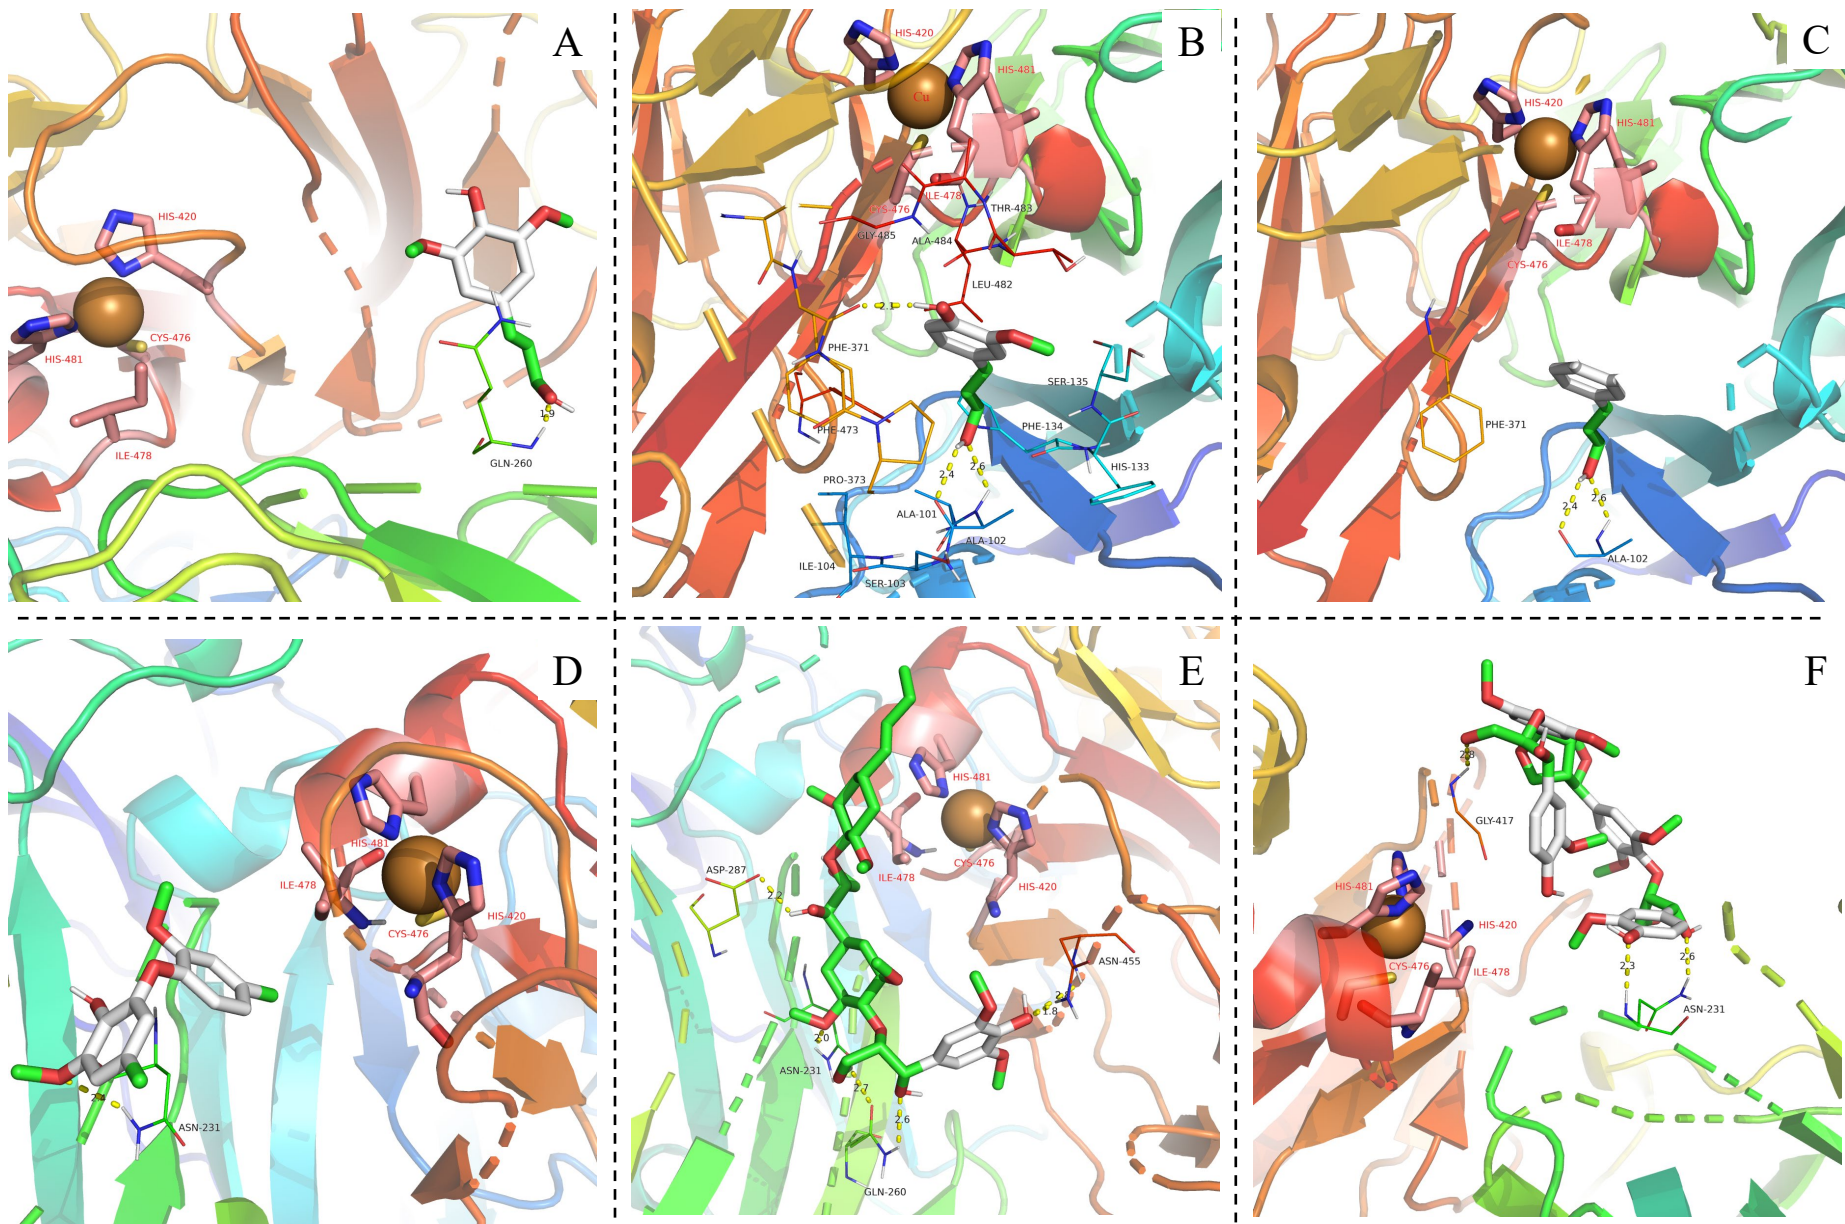

Figure S8 Shows *AaLacII* docked with lignin model compounds. A) Sinapyl alcohol, B) Coniferyl alcohol, C) *p*-Coumaryl alcohol, D) Dimer (guaiacyl 4-O-5 guaiacyl), E) Trimer (syringyl  $\beta$ -O-4 syringyl  $\beta$ -O-4 sinapyl alcohol), F) Tetramer (guaiacyl  $\beta$ -O-4 syringyl  $\beta$ -O-4 syringyl  $\beta$ -O-4 guaiacyl).
