# Supplementary material for: Genes Identification, Molecular Docking and Dynamics Simulation Analysis of Laccases from Amylostereum areolatum Provides Molecular Basis of Laccase Bound to Lignin
Source: MDPI journal article supplement (doi:10.3390/ijms21228845), 2020-11-22
Supplement: s1 [file s1]

**Motif1**

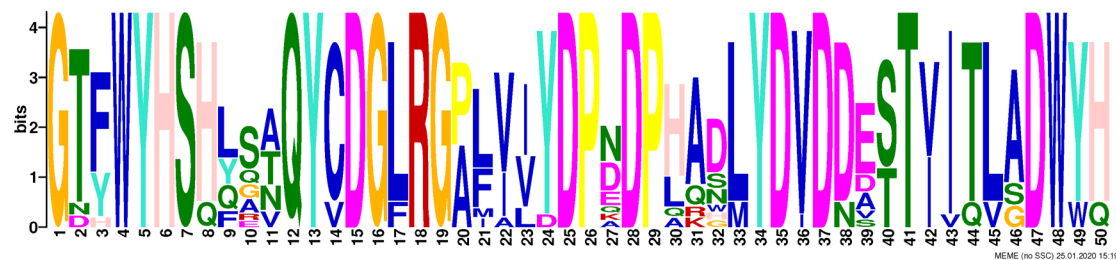

**Motif2**

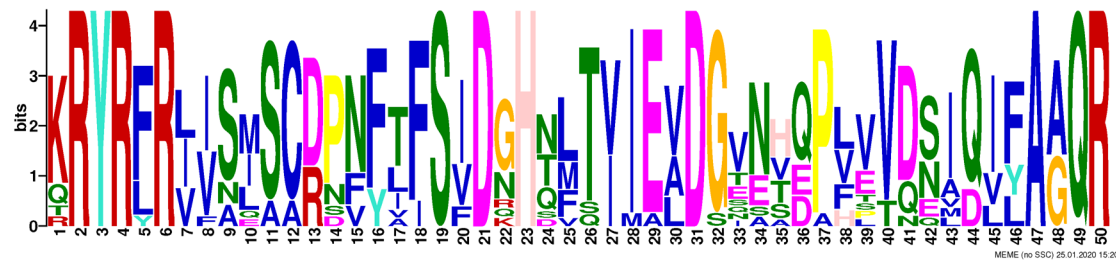

**Motif3**

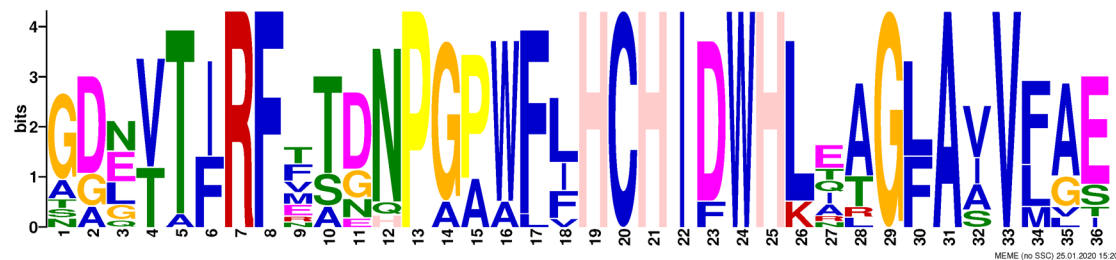

**Motif4**

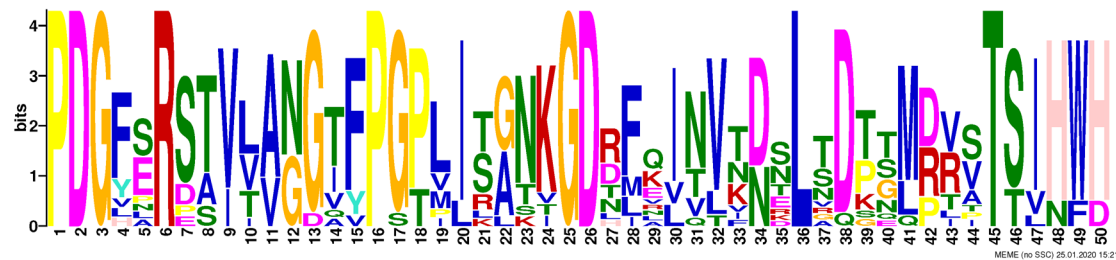

Figure S2 Four conserved motifs in *A. areolatum* laccase proteins analyzed by the MEME search tool. The height of each box represents the specific amino acid conservation in each motif.
