# Supplementary figures and images for: Genes Identification, Molecular Docking and Dynamics Simulation Analysis of Laccases from Amylostereum areolatum Provides Molecular Basis of Laccase Bound to Lignin
Source: MDPI journal article supplement (doi:10.3390/ijms21228845), 2020-11-22

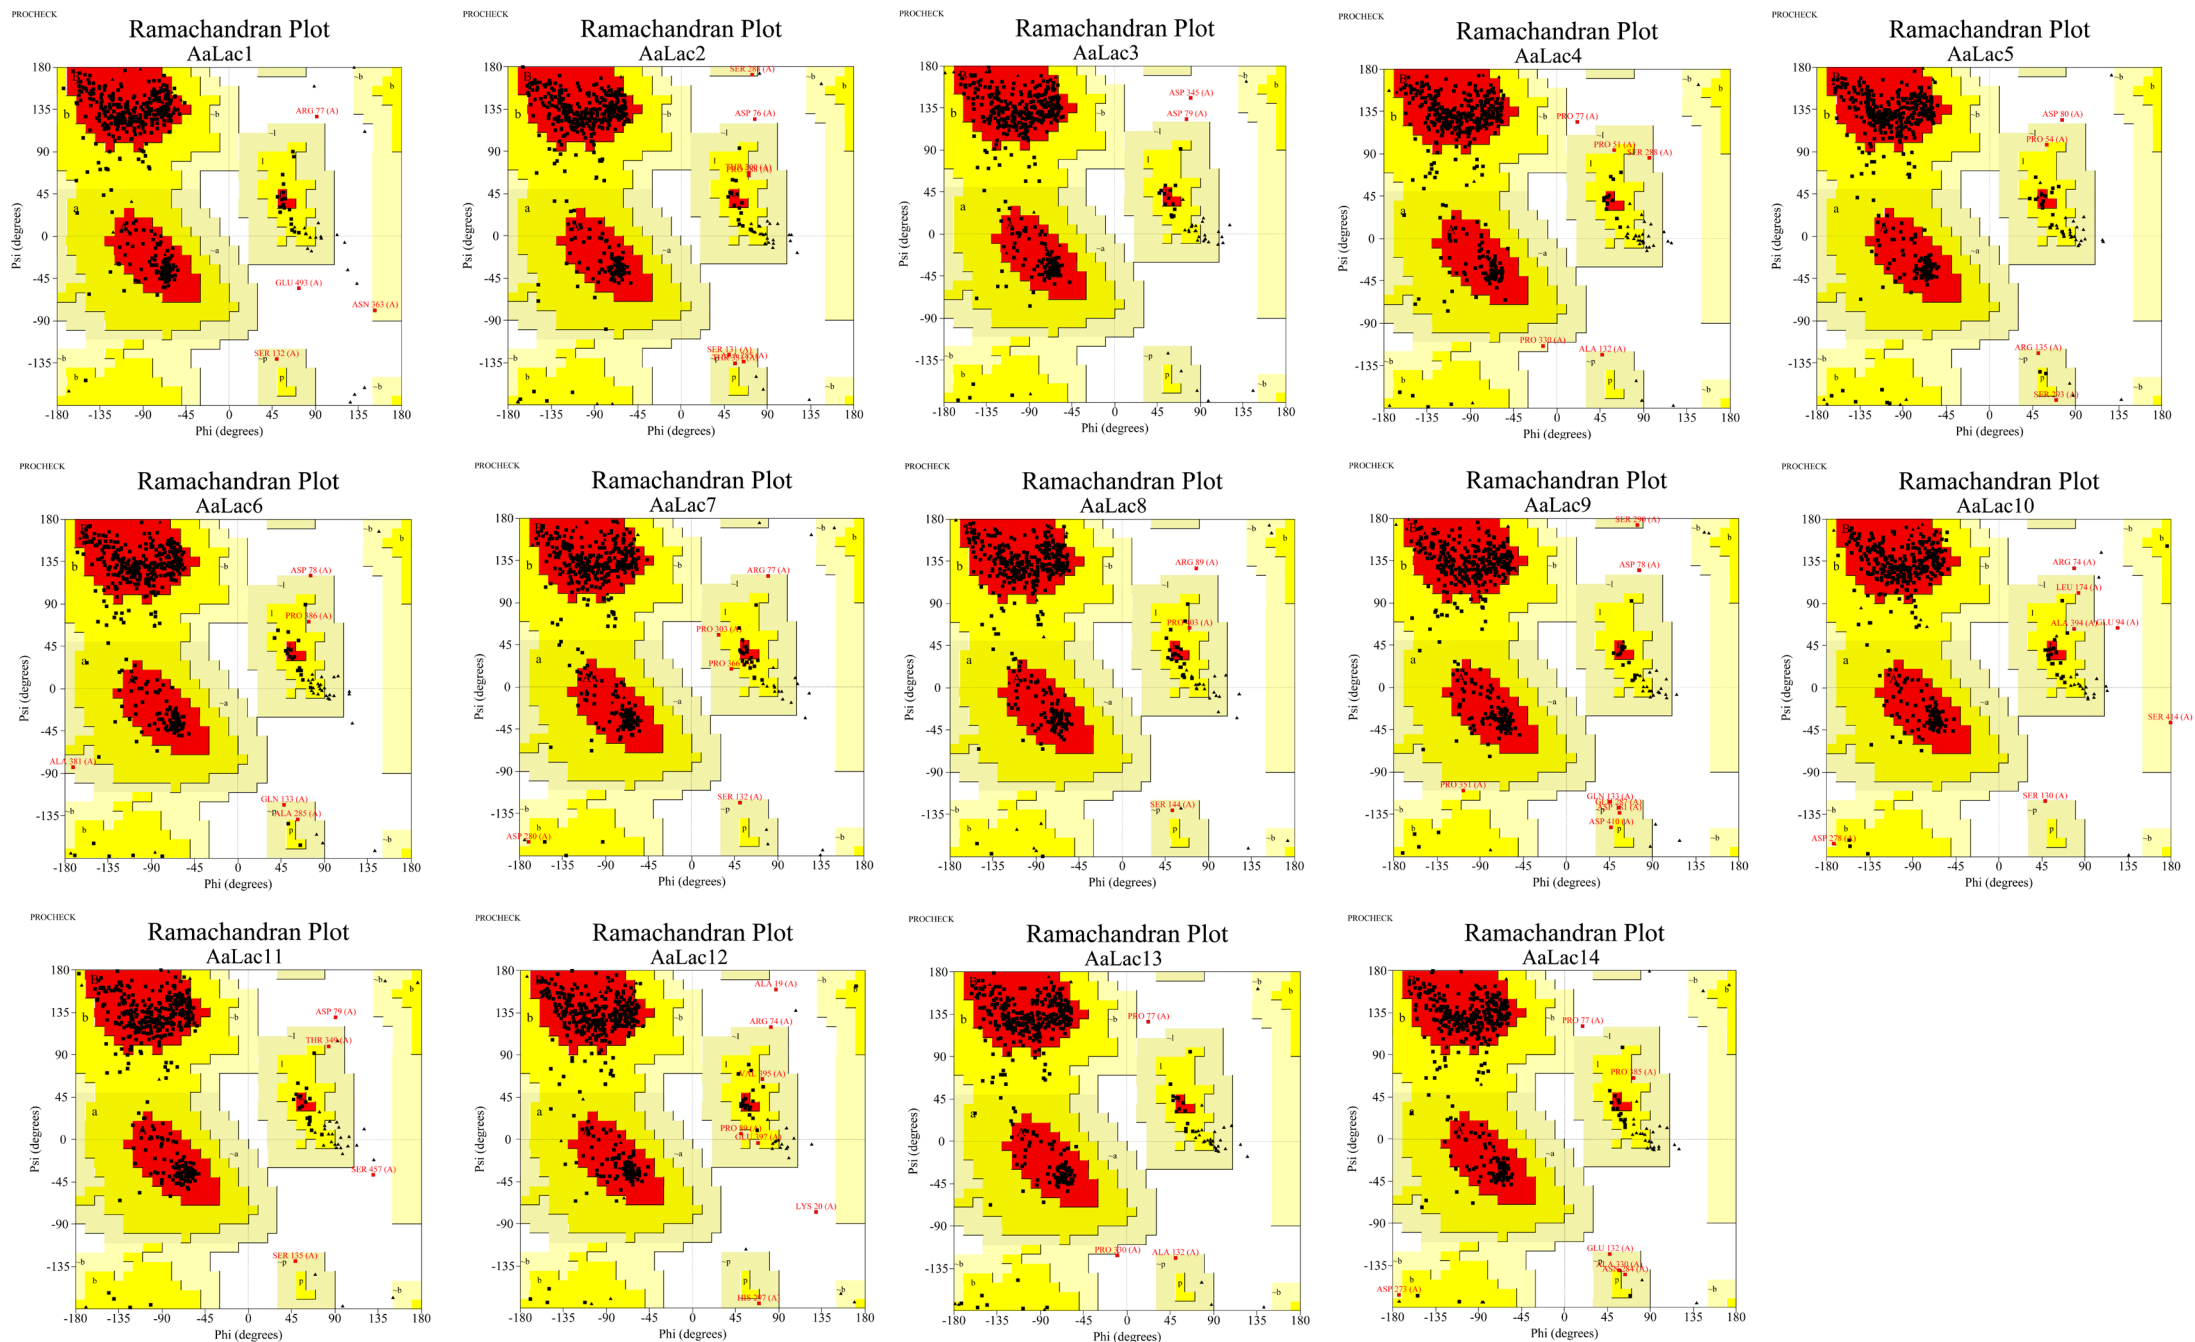

Figure S3 Ramachandran plots of *A. areolatum* laccase protein molecular models

Supplement: s1 [file s1]

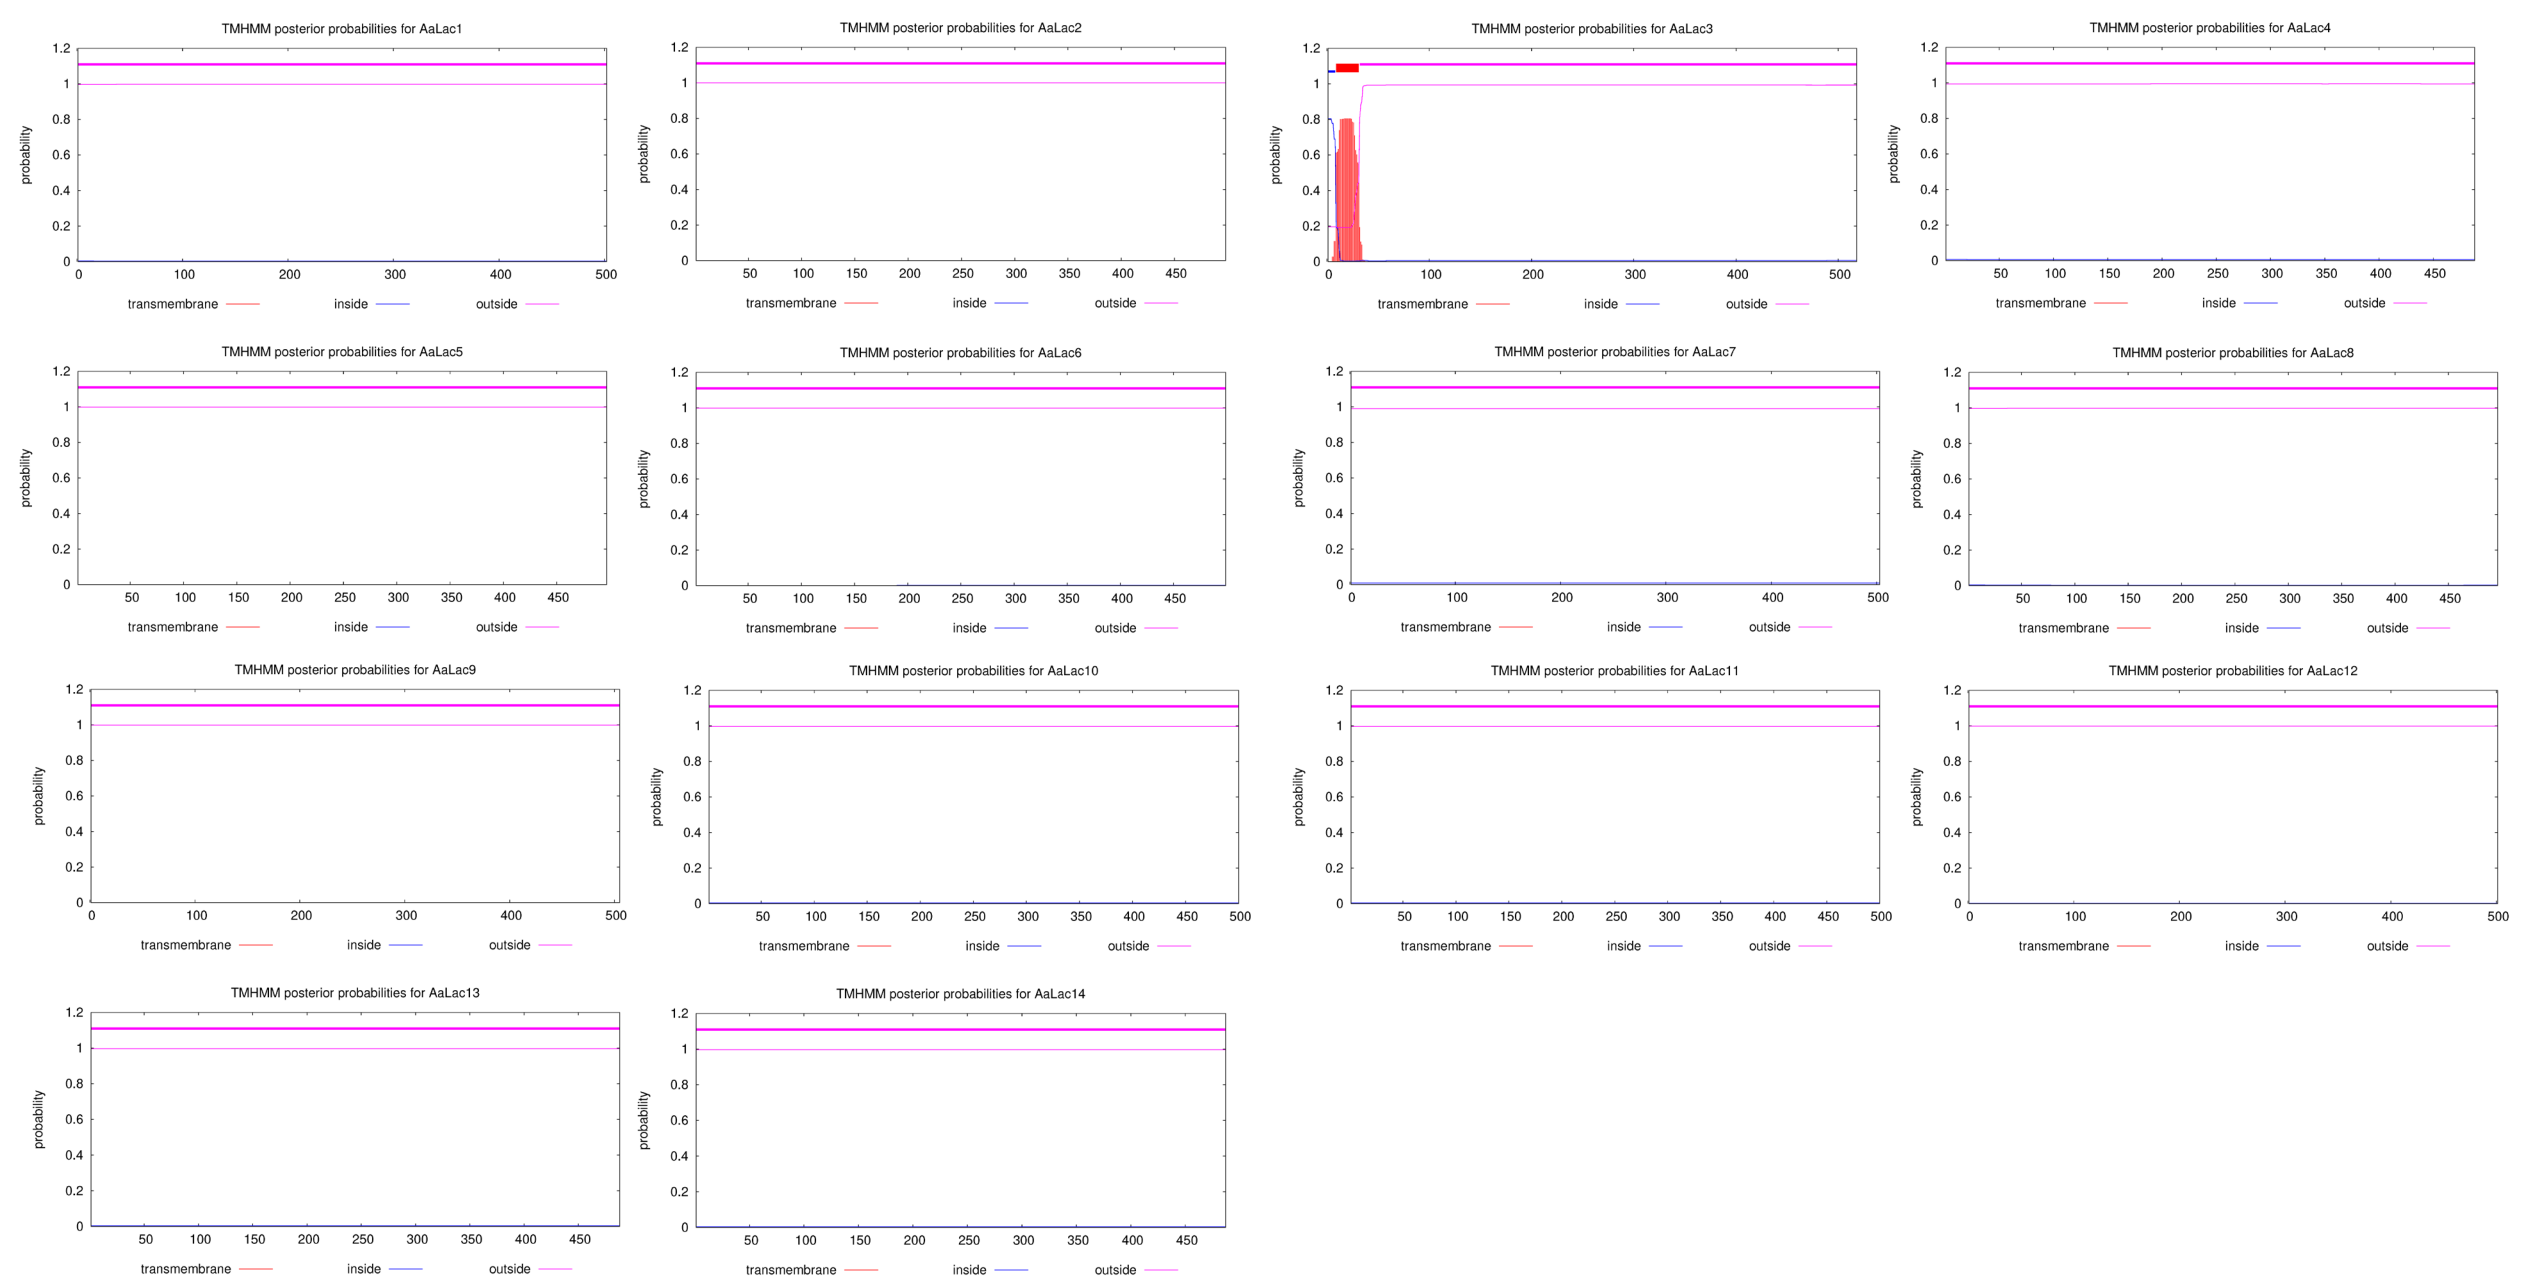

Figure S1 TMHMM plots of *A. areolatum* laccase protein sequences

Supplement: s1 [file s1]
